# Supplementary material for: Plasma Biomarkers of Neurodegeneration and Neuroinflammation among Middle- Aged Adults in Western India: Implications of Racial and Geographical Variability
Source: Research Square preprint supplement (doi:10.21203/rs.3.rs-7788186/v1), 2025-11-21
Supplement: Supplementary file 1 [file d7bd6c9c039a1dda9bd7b6ad.docx]

**Supplementary Tables**

**Supplement table 1: Amyloid-β(1-42) levels among apparently cognitively normal adults**

| **Citation & Region** | **Sample Characteristics** | **Amyloid-β(1-42) level (pg/mL)** | |
| --- | --- | --- | --- |
| **Central Tendency** | **Dispersion** |
| (West *et al.*, 2021)  (USA) | N =161,  Age: 73.6 ± 7.4 | Mean: 40.4 | SD: 9.7 |
| N =253,  Age: 67.7 ± 8.1 | Mean: 44.4 | SD: 8.6 |
| (Lu *et al.*, 2025)  (USA) | N =208,  Age: 73.91 ± 5.19,  98 males | Mean: 45.49 | SD: 8.00 |
| (Deniz *et al.*, 2021)  (Florida, USA) | N =162,  Age: 82.7±8.15,  38 males | Mean: 12.6 | SD: 4.3 |
| (Mengel *et al.*, 2020)  (USA) | N =100,  Age: 23.45 ± 17.48 | Mean: 19.82 | SD: 8.15 |
| (Bogoslovsky *et al.*, 2017)  (USA) | N =69,  Age: 45 (31–52) Median (IQR)  23 males | Median: 4.1 | IQR: 2.7 - 22.3 |
| (Miner *et al.*, 2024)  (USA) | N =51,  Age: 59.5 ± 8.5,  51 males | Mean: 7.02 | SD: 1.77 |
| (Castillo-Mendieta *et al.*, 2021)  (Mexico) | N =51,  Age: 80.5±8.18,  5 males | Mean: 1.16 | SD: 0.64 |
| (Lashkari *et al.*, 2020)  (USA) | N =33,  Age: 72.4 ± 7.71,  13 males | Mean: 320 | SE: 50 |
| N =32,  Age: ≤ 34 | Mean: 14.85 | SD: 4.09 |
| (Lashkari *et al.*, 2020)  (USA) | N =27,  Age: 76.8 ± 6.14,  5 males | Mean: 68.22 | SE: 19.56 |
| (Mehta *et al.*, 2020)  (USA) | N =25,  Age: 71 ± 9 | Mean: 5.9 | SD: 5.1 |
| N =25,  Age: 45 ± 7 | Mean: 13.8 | SD: 19.1 |
| (Bubak *et al.*, 2020)  (Texas - USA) | N =10,  Age: 50.0 ± 3.33 (SEM) | Mean: 12 | SE: 3.88 |
| (Wang *et al.*, 2022)  (China) | N =1085,  Age: 54.83 ± 9.52,  438 males | Mean: 41.06 | SD: 6.78 |
| (Jingshan Chen *et al.*, 2023)  (China) | N =193,  Age: 67.3 ± 9.8,  97 males | Mean: 6.91 | SD: 2.13 |
| (Lue *et al.*, 2019)  (China) | N =156,  Age: 23-91 | Mean: 15.18 | SD: 2.13 |
| (L.-M. Li *et al.*, 2025)  (China) | N =150,  Age: 49.54 ± 17.04 (21 – 85),  63 males | Mean: 7.96 | SD: 2.03 |
| (Chiu *et al.*, 2020)  (Taiwan) | N =134,  Age: 68.4 ± 7.7,  45 males | Mean: 14.65 | SD: 1.45 |
| (C. H. Lin *et al.*, 2020)  (Taiwan) | N =97,  Age: 64.0 ± 7.8,  31 males | Mean: 15.66 | SD: 2.58 |
| (Feng Gao *et al.*, 2023)  (China) | N =96,  Age: 59.1 ± 8.8,  43 males | Mean: 11.7 | SD: 2.7 |
| N =93,  Age: <35 (27.17 ± 4.53),  36 males | Mean: 14.76 | SD: 4.16 |
| N =93,  Age: >65 (75.4 ± 6.78),  68 males | Mean: 18.67 | SD: 6.36 |
| (Jin *et al.*, 2015)  (China) | N =90,  Age: 68.41±7.32 (51 - 95) | Mean: 2.19 | SD: 1.07 |
| (Chang *et al.*, 2024)  (Taiwan) | N =90,  Age: 25 - 88 (range),  45 males | Mean: 9.325 | SD: 2.621 |
| (Hsu *et al.*, 2017)  (Taiwan) | N =88,  Age: 77.0 ± 6.2,  54 males | Mean: 36.9 | SD: 20.8 |
| (Shi *et al.*, 2019)  (China) | N =87,  Age: 64.77 ± 7.40,  36 males | Mean: 8.14 | SD: 3.12 |
| N =82,  Age: > 64,  58 males | Mean: 18.93 | SD: 5.93 |
| (W.-Q. Fang *et al.*, 2020)  (Taiwan) | N =77,  Age: 52.65 ± 19.09,  29 males | Mean: 15.88 | SD: 0.41 |
| (Jin *et al.*, 2017)  (China) | N =70,  Age: 57.09 ± 8.41,  44 males | Mean: 30.5 | SD: 33.51 |
| (Chiu *et al.*, 2020)  (Taiwan) | N =67,  Age: 63.3 ± 8.9,  26 males | Mean: 15.8 | SD: 0.7 |
| (Tian *et al.*, 2018)  (China) | N =60,  Age: 59 (53.0 - 64.7) Median (IQR) | Median: 165.34 | IQR: 162.27 - 168.35 |
| (Hong *et al.*, 2025)  (Taiwan) | N =58,  Age: 66.05 ± 7.06,  36 males | Mean: 1.37 | SD: 0.5 |
| (Chung *et al.*, 2021)  (Taiwan) | N =46,  Age: 67.04 ± 7.04,  18 males | Median: 1.28 | SD: 0.33 |
| (Pai *et al.*, 2022)  (Taiwan) | N =37,  Age: 63.1 ± 12.4,  14 males | Mean: 14.26 | SD: 1.42 |
| (Wei *et al.*, 2024)  (Taiwan) | N =36,  Age: 67.17 ± 3.03,  14 males | Mean: 16.5 | SD: 0.45 |
| (R. Singh *et al.*, 2024)  (India) | N =30,  Age: 67.53 ± 1.15,  21 males | Mean: 7.89 | SE: 0.53 |
| (Chen *et al.*, 2025)  (China) | N =30,  Age: 65.9 ± 6.0,  17 males | Mean: 7 | SD: 1.6 |
| (Ding *et al.*, 2017)  (China) | N =26,  Age: 64.77 ± 4.16,  10 males | Mean: 320.39 | SD: 62.72 |
| (Liu *et al.*, 2025)  (China) | N =22,  Age: 70 ± 8.3,  9 males | Mean: 10.9 | SD: 5 |
| (Hsu *et al.*, 2021)  (Taiwan) | N =22,  Age: 66.3 ± 8.9,  10 males | Mean: 90 | SD: 2.9 |
| (Chen *et al.*, 2024)  (China) | N =20,  Age: 65.7 ± 9.1,  10 males | Mean: 6 | SD: 1.5 |
| (Gu *et al.*, 2020)  (China) | N =15,  Age: 64.80 ± 6.00,  5 males | Mean: 5.4 | SD: 1.7 |
| (Chen *et al.*, 2019)  (Taiwan) | N =13,  Age: 73.0 (62.5–80.0) Median (IQR),  9 males | Median: 73 | IQR: 62.5 - 80.0 |
| (Kitaguchi *et al.*, 2019)  (Japan) | N =11,  Age: 67.8 ± 3.9,  5 males | Mean: 24.6 | SD: 5.7 |
| (Martiskainen *et al.*, 2017)  (Finland) | N =141,  Age: 57.6 ±6.1 | Mean: 34.4 | SD: 6.9 |
| (Gil-Montoya *et al.*, 2017)  (Spain) | N =122,  Age: 75.7 ± 6.1,  62 males | Mean: 25.2 | SD: 11.2 |
| (Zecca *et al.*, 2021)  (Italy) | N =89,  Age: 35-65 (52.3 ± 9.19),  51 males | Mean: 19.96 | SD: 5.96 |
| (Zecca *et al.*, 2018)  (Italy) | N =79,  Age: 35-64,  32 males | Mean: 19.31 | SD: 5.9 |
| (Pilotto *et al.*, 2024)  (Italy) | N =78,  Age: 69.4 ± 7.9,  24 males | Mean: 10.9 | SD: 3.4 |
| (Fortea *et al.*, 2018)  (Spain) | N =67,  Age: 52.05 (47.09–54.42) Mean (IQR),  20 males | Median: 9.38 | IQR: 8.67 - 10.43 |
| (Rosenblum *et al.*, 2024)  (Netherlands, Germany, UK) | N =60,  Age: 39.8 ± 16.0 (Range: 20–68),  28 males | Mean: 24.3 | SD: 6 |
| (Gómez-Tortosa *et al.*, 2025)  (Spain) | N =54,  Age: 69 ± 5,  23 males | Median: 7.7 | IQR: 5.8 - 9.2 |
| (Quaresima *et al.*, 2024)  (Italy) | N =50,  Age: 65.28 ± 7.37,  22 males | Mean: 23.57 | SD: 4.91 |
| (Teunissen *et al.*, 2018)  (Netherlands, Taiwan, Sweden, UK) | N =43,  Age: 71.6 ± 11.3,  15 males | Mean: 15.5 | SD: 2.1 |
| (Martiskainen *et al.*, 2017)  (Finland) | N =37,  Age: 57.7 ±7.6 | Mean: 34.2 | SD: 6.5 |
| (Przybylska-Kuć *et al.*, 2019)  (Poland) | N =31,  Age: 46.1 ± 14.1,  17 males | Mean: 79.5 | SD: 54.1 |
| (Iulita *et al.*, 2016)  (Italy) | N =29,  Age: 38 ± 2.0 (Mean ± SEM), 17 - 55 (Range),  16 males | Mean: 9.14 | SE: 0.9 |
| (Startin *et al.*, 2019)  (UK, Spain, and Italy) | N =27,  Age: 49.26 ± 10.40 (24–64 years),  16 males | Median: 14.76 | Range: 2.00–45.62 |
| (Fišar *et al.*, 2019)  (Prague, Czech Republic) | N =25,  Age: 67.0 ± 6.4,  15 males | Mean: 40 | SD: 23 |
| (Conti *et al.*, 2016)  (Italy) | N =25,  Age: 71.3 ± 4.2 (66–80),  15 males | Mean: 17.5 | SE: 2.9 |
| (Shahim *et al.*, 2022)  (Swedan) | N =19,  Age: 25 (21-35) mean (Range),  15 males | Median: 8.26 | Range: 7.23 - 9.71 |
| (Mohaupt *et al.*, 2024)  (Germany) | N =12,  Age: 71 (59 - 74) Median (IQR),  5 males | Median: 10 | IQR: 8.96 - 12.9 |
| (Mothapo *et al.*, 2015)  (Netherland and UK) | N =10,  Age: 45 (Median) | Median: 16 |  |
| (Gren *et al.*, 2016)  (Sweden) | N =5,  Age: 32 (27–38) Median (Range),  4 males | Median: 11.9 | Range: 5.07 - 20.2 |
| (Fortea *et al.*, 2020)  (Spain & UK) | N =242,  Age: 56.6 (50.4–63.8),  80 males | Median: 9 | IQR: 7.7–10.1 |
| (Sewell *et al.*, 2024)  (Australia) | N =32,  Age: 68.7 ± 5.9,  13 males | Mean: 5.6 | SD: 1.1 |

Summary of blood amyloid-β(1-42) levels among control participants in included studies. Reported values reflect means or medians with respective measures of dispersion (standard deviation, interquartile range, or standard error), and include sample demographics where available

**Supplement table 2:** **Total τ levels among apparently cognitively normal adults**

| **Citation & Region** | **Sample Characteristics** | **Total τ level (pg/mL)** | |
| --- | --- | --- | --- |
| **Central Tendency** | **Dispersion** |
| (Bogoslovsky *et al.*, 2017)  (USA) | N =69,  Age: 45 (31–52) Median (IQR),  23 males | Median: 4.34 | IQR: 2.74 - 5.12 |
| (Miner *et al.*, 2024)  (USA) | N =51,  Age: 59.5 ± 8.5,  51 males | Mean: 1.46 | SD: 0.074 |
| (Castillo-Mendieta *et al.*, 2021)  (Mexico) | N =51,  Age: 80.5 ± 8.18,  5 males | Mean: 2.13 | SD: 0.11 |
| (Gill *et al.*, 2018)  (USA) | N = 49,  Age: 48.61 ± 15.93,  30 males | Median: 1.25 | IQR: 0.71–2.09 |
| (Barthélemy *et al.*, 2020)  (USA) | N = 48,  Age: 67.7±13.3,  21 males | Mean: 21.36 | SD: 5.72 |
| (Galenko *et al.*, 2019)  (Utah - USA) | N = 47,  Age: 57.8±11.8,  21 males | Median: 40.8 | IQR: 14.62 - 77.45 |
| (Janelidze *et al.*, 2022)  (USA) | N =28,  Age: 45.0 (32.0–54.0) Median (IQR) | Median: 1.82 | IQR: 1.56 - 2.40 |
| (Rubenstein *et al.*, 2017)  (USA) | N = 20,  Age: 40.5±14.2 (22-61),  14 males | Median: 62.59 | IQR: 50.36 - 69.43 |
| (N. A. Singh *et al.*, 2024)  (USA) | N =8,  Age: 64.6 (61.4 – 67.3) Median (Range)  3 males | Median: 1.645 | IQR: 1.371 - 2.078 |
| (J. Chen *et al.*, 2023)  (China) | N =193,  Age: 67.3 ± 9.8,  97 males | Median: 0.78 | IQR: 0.52 - 1.31 |
| (Lue *et al.*, 2019)  (China) | N =156,  Age: 23-91 | Mean: 19.28 | SD: 8.33 |
| (L. M. Li *et al.*, 2025)  (China) | N =150,  Age: 49.54 ± 17.04,  63 males | Mean: 3.07 | SD: 1.19 |
| (Chiu *et al.*, 2020)  (Taiwan) | N =134,  Age: 68.4 ± 7.7,  45 males | Mean: 20.2 | SD: 10.5 |
| (C. H. Lin *et al.*, 2020)  (Taiwan) | N =97,  Age: 64.0 ± 7.8,  31 males | Mean: 16.95 | SD: 9.61 |
| (F. Gao *et al.*, 2023)  (China) | N =96,  Age: 59.1 ± 8.8,  43 males | Mean: 3 | SD: 3.8 |
| (Chang *et al.*, 2024)  (Taiwan) | N =90,  Age: 67 (25 – 88) median (range),  45 males | Mean: 4.309 | SD: 1.277 |
| (Shi *et al.*, 2019)  (China) | N =87,  Age: 64.77 ± 7.40,  36 males | Mean: 3.56 | SD: 1.84 |
| (W. Q. Fang *et al.*, 2020)  (Taiwan) | N =77,  Age: 52.65 ± 19.09,  29 males | Mean: 14.94 | SD: 6.31 |
| N =70,  Age: 65 - 95 (73.6 ± 4.9),  32 males | Mean: 18.14 | SD: 7.33 |
| (Chiu *et al.*, 2020)  (Taiwan) | N =67,  Age: 63.3 ± 8.9,  26 males | Mean: 13.3 | SD: 6.9 |
| (Yang *et al.*, 2017)  (Taiwan) | N =66,  Age: 64.6 ± 8.6 | Mean: 13.37 | SD: 7.77 |
| (Jiang *et al.*, 2019)  (China) | N =58,  Age: 74.60 ± 7.97 | Mean: 15.02 | SD: 9.04 |
| (Hong *et al.*, 2025)  (Taiwan) | N =58,  Age: 66.05 ± 7.06,  36 males | Mean: 4.65 | SD: 1.99 |
| (Chiu *et al.*, 2017)  (Taiwan) | N =56,  Age: 45-64 (58.1 ± 4.9),  16 males | Mean: 14.35 | SD: 6.49 |
| (Chung *et al.*, 2021)  (Taiwan) | N =46,  Age: 67.04 ± 7.04,  18 males | Median: 4.5 | SD: 2.03 |
| (Pai *et al.*, 2022)  (Taiwan) | N =37,  Age: 63.1 ± 12.4,  14 males | Mean: 15.13 | SD: 3.62 |
| (Wei *et al.*, 2024)  (Taiwan) | N =36,  Age: 67.17 ± 3.03,  14 males | Mean: 22.6 | SD: 2.96 |
| (Chen *et al.*, 2025)  (China) | N =30,  Age: 65.9 ± 6.0,  17 males | Mean: 1.5 | SD: 0.7 |
| (Kasai *et al.*, 2019)  (Japan) | N =29,  Age: 66.1 ± 9.2,  19 males | Mean: 0.81 | SD: 0.36 |
| (Ding *et al.*, 2017)  (China) | N =26,  Age: 64.77 ± 4.16,  10 males | Mean: 259.59 | SD: 60.46 |
| (Yang *et al.*, 2018)  (Taiwan) | N =23,  Age: 67.5 ± 7.1 | Mean: 18.85 | SD: 10.16 |
| (Liu *et al.*, 2025)  (China) | N =22,  Age: 70 ± 8.3,  9 males | Mean: 0.9 | SD: 0.5 |
| (Hsu *et al.*, 2021)  (Taiwan) | N =22,  Age: 66.3 ± 8.9,  10 males | Mean: 1.8 | SD: 0.9 |
| (Kasai *et al.*, 2017)  (Japan) | N =22,  Age: 37.4 ± 12.0,  12 males | Mean: 0.47 | SD: 0.23 |
| (C. H. Li *et al.*, 2025)  (Taiwan) | N =18,  Age: 63.8 ± 10.6,  7 males | Mean: 3.2 | SD: 1.2 |
| (Chen *et al.*, 2019)  (Taiwan) | N =13,  Age: 73.0 (62.5–80.0) Median (IQR),  9 males | Median: 18.7 | IQR: 15.6 - 23.2 |
| (Kitaguchi *et al.*, 2019)  (Japan) | N = 11,  Age: 67.8 ± 3.9  5 males | Mean: 0.63 | SD: 0.3 |
| (Fortea *et al.*, 2018)  (Spain) | N =67,  Age: 52.05 (47.09–54.42)  Mean (IQR),  20 males | Median: 2.23 | IQR: 1.69 - 3.89 |
| (Illán-Gala *et al.*, 2021)  (USA, Spain, Sweden, UK) | N = 55,  Age: 52.2 ± 13,  25 males | Median: 2.2 | IQR: 1.8–2.7 |
| (Gómez-Tortosa *et al.*, 2025)  (Spain) | N = 54,  Age: 69 ± 5,  23 males | Median: 2.64 | IQR: 2.12 - 3.55 |
| (Abu-Rumeileh *et al.*, 2020)  (Rome) | N =37,  Age: 57.5±10.2,  21 males | Median: 2 | IQR: 1.3–2.5 |
| (Lekomtseva, 2020)  (Ukrain) | N =30,  Age: 29.6 ± 4.73 | Mean: 71.14 | SD: 20.56 |
| (De Vos *et al.*, 2015)  (Belgium) | N =29,  Age: 48 (42–62) Median (IQR),  11 males | Median: 11.7 | IQR: 5.7–26.7 |
| (Startin *et al.*, 2019)  (UK, Spain, and Italy) | N =27,  Age: 49.26 ± 10.40 (24–64 years),  16 males | Median: 1.49 | Range: 0.16–10.24 |
| (Marelli *et al.*, 2020)  (France and Paris) | N =19,  Age: 60 (59 - 61) Median (Range) | Median: 0.39 | Range: 0.15 - 2.45 |
| (Shahim *et al.*, 2022)  (Swedan) | N =19,  Age: 25 (21-35) Mean (Range),  15 males | Median: 1.77 | Range: 1.33 - 2.16 |
| (Gren *et al.*, 2016)  (Sweden) | N =5,  Age: 32 (27–38) Median (Range),  4 males | Median: 0.007 | Range: 0.007 - 0.007 |
| (Fortea *et al.*, 2020)  (Spain & UK) | N =242,  Age: 56.6 (50.4–63.8),  80 males | Median: 2.2 | IQR: 1.7–3.4 |

Summary of blood Total τ levels among control participants in included studies. Reported values reflect means or medians with respective measures of dispersion (standard deviation, interquartile range, or standard error), and include sample demographics where available

**Supplement table 3:** **α - Synuclein levels among apparently cognitively normal adults**

| **Citation & Region** | **Sample Characteristics** | **α - Synuclein level (pg/mL)** | |
| --- | --- | --- | --- |
| **Central Tendency** | **Dispersion** |
| (Goldman *et al.*, 2018)  (USA) | N =88,  Age: 65.64 ± 7.36,  45 males | Mean: 115920.3 | SD: 71392.1 |
| (Xu *et al.*, 2024)  (China) | N =187,  Age: 67.6 ± 6.40,  87 males | Mean: 3216.9 | SD: 3540.4 |
| (Jiao *et al.*, 2025)  (China) | N =184,  Age: 67.6 ± 6.5,  84 males | Median: 9.42 | IQR: 3.14 - 17.27 |
| (C. H. Lin *et al.*, 2020)  (Taiwan) | N =97,  Age: 64.0 ± 7.8,  31 males | Mean: 0.09 | SD: 0.05 |
| (Zou *et al.*, 2020)  (China) | N =85,  Age: 66.22 ± 10.30,  48 males | Mean: 3.01 | SD: 1.67 |
| (Hong *et al.*, 2025)  (Taiwan) | N =58,  Age: 66.05 ± 7.06,  36 males | Mean: 80.9 | SD: 31.6 |
| (Ng *et al.*, 2019)  (Singapore) | N =51,  Age: 63.3 ± 7.4,  22 males | Mean: 13057 | SD: 7770.9 |
| (Sun *et al.*, 2019)  (China) | N =46,  Age: 43.46 ± 9.70,  33 males | Mean: 21.08 | SD: 16.21 |
| (Wang *et al.*, 2019)  (China) | N =45,  Age: 58.3 ± 16.5 (35-84),  30 males | Mean: 297.1 | SD: 192.82 |
| (Peng *et al.*, 2020)  (China) | N =40,  Age: 55.6 ± 13.4,  21 males | Median: 406 | Range: 184.1–880.4 |
| (W. C. Lin *et al.*, 2020)  (Taiwan) | N =33,  Age: 62.8 ± 6.2 | Mean: 100 | Range: 1.98 – 1335.2 |
| (Ding *et al.*, 2017)  (China) | N =26,  Age: 64.77 ± 4.16,  10 males | Mean: 274.31 | SD: 70.71 |
| (Fan *et al.*, 2020)  (China) | N =24,  Age: 57.92 ± 1.58,  13 males | Mean: 283.6 | SE: 19.03 |
| (Chen *et al.*, 2020)  (Taiwan) | N =12,  Age: 69.3 ± 17.9,  5 males | Mean: - 2.64  (Log Transformed) | SD: 0.34  (Log Transformed) |
| (Emmanouilidou *et al.*, 2020)  (Greece) | N =68,  Age: 62.9 (38–81),  21 males | Mean: 28.3 | SD: 4.23 |
| (Brudek *et al.*, 2017)  (Denmark) | N =41,  Age: 43.9 ± 14.2 (21 - 85),  7 males | Mean: 127 | SD: 8.3 |
| (Folke *et al.*, 2019)  (Denmark) | N =59,  Age: 41.2 ± 13.5,  10 males | Mean: 638 | SD: 251 |
| (Koehler *et al.*, 2015)  (Germany) | N =40,  Age: 58.1 ± 0.7 (mean ± SE) (95% CI 56.6–59.6)  40 males | Mean: 3600 | SE: 1400 |
| N =40,  Age: 27.6 ± 0.7 (mean ± SE) (95% CI 26.2–28.9)  40 males | Mean: 11400 | SE: 3200 |
| (Bougea *et al.*, 2020)  (Greece) | N =30,  Age: 68.9 ± 8.3,  15 males | Mean: 1.9 | SD: 2 |
| (Pchelina *et al.*, 2017)  (Russia) | N =27,  Age: 60.18 ± 1.97 | Median: 0.85 | IQR: 0.32 - 47.12 |
| (Chan *et al.*, 2022)  (Australia) | N =50,  Age: 67.1±10.0 (45-96)  29 males | Mean: 0.64 | SD: 0.5 |

Summary of blood α - Synuclein levels among control participants in included studies. Reported values reflect means or medians with respective measures of dispersion (standard deviation, interquartile range, or standard error), and include sample demographics where available

**Supplement table 4:** **BDNF levels among apparently cognitively normal adults**

| **Citation & Region** | **Sample Characteristics** | **BDNF Level (pg/mL)** | |
| --- | --- | --- | --- |
| **Central Tendency** | **Dispersion** |
| (Wilhelm *et al.*, 2017)  (Portland, USA) | N =31,  Age: 37.55 ± 13.82  21 males | Mean: 1910 | SD: 781.2 |
| (Cabral *et al.*, 2022)  (USA) | N =30,  Age: 60.3 ± 3.8,  11 males | Mean: 492.6 | SD: 348.1 |
| (Aldoghachi *et al.*, 2019)  (Malaysia) | N =206,  Age: 18 - 65 | Mean: 7287 | SD: 342.1 |
| (Wang *et al.*, 2025)  (Taiwan) | N = 186,  Age: 32.2 ± 8.90,  105 males | Mean: 14454.4 | SD: 1002.5 |
| (Wang *et al.*, 2024)  (Taiwan) | N =118,  Age: 36.9 ± 11.8,  59 males | Mean: 20710 | SD: 10930 |
| (Yu *et al.*, 2019)  (China) | N =107,  Age: 53.6 ± 7.0,  84 males | Median: 6500 | IQR: 3700 - 10500 |
| N =103,  Age: 49.9 ± 10.3,  85 males | Median: 3300 | IQR: 2300 - 7500 |
| N =318,  Age: 67.0 ± 7.1,  170 males | Median: 2100 | IQR: 13100 - 32000 |
| (Jin *et al.*, 2018)  (China) | N =91,  Age: 62.8±10.2,  49 males | Median: 1361 | IQR: 884–1846 |
| (Wang *et al.*, 2017)  (Taiwan) | N =81,  Age: 32.5±8.2, | Mean: 18630.14 | SD: 274.01 |
| (Wang *et al.*, 2015)  (China) | N =63,  Age: 34.3±10.8,  33 males | Mean: 4115.4 | SD: 2290.1 |
| (Zhang *et al.*, 2018)  (China) | N =62,  Age: 26.15 ± 5.61,  40 males | Mean: 4220 | SD: 1130 |
| (Xu *et al.*, 2020)  (China) | N =61,  Age: 42.39 ± 11.41  61 males | Mean: 5706 | SD: 2143 |
| (Wei *et al.*, 2020)  (China) | N =60,  Age: 47.7±4.5,  44 males | Mean: 9653 | SD: 4718 |
| (Kim *et al.*, 2019)  (South Korea) | N =59,  Age: 38.47±14.57,  22 males | Mean: 9.29 | SD: 5.62 |
| (An *et al.*, 2019)  (South Korea) | N =59,  Age: 38.47±14.57,  22 males | Mean: 9288.43 | SD: 5616.56 |
| (Fu *et al.*, 2024)  (China) | N =58,  Age: 27.50 ± 9.0,  26 males | Mean: 895.19 | SD: 223.16 |
| (Jin *et al.*, 2021)  (China) | N =51,  Age: 60 ± 12,  51 males | Mean: 1770 | SD: 320 |
| (Hori *et al.*, 2017)  (Japan) | N =51,  Age: 36.7 ± 9.9,  26 males | Mean: 11100 | SD: 3900 |
| (Lee *et al.*, 2021)  (South Korea) | N =50,  Age: 36.8 ± 3.9,  16 males | Mean: 733.3 | SD: 176.58 |
| (Dutt *et al.*, 2020)  (India) | N =50,  Age: 29.08 ± 5.12,  21 males | Median: 575 | IQR: 384.25–770.00 |
| (Ng *et al.*, 2021)  (Singapore) | N =48,  Age: 66.9 ± 4.29 | Mean: 446.7 | SD: 308.4 |
| (Zhao *et al.*, 2017)  (China) | N =44,  Age: 29.21 ± 4.84,  22 males | Mean: 353.8 | SD: 138.67 |
| (Ren *et al.*, 2017)  (China) | N =40,  Age: 69.53 ± 5.71,  18 males | Median: 969.41 | IQR: 138.64 – 1819.45 |
| (Mo *et al.*, 2021)  (China) | N =37,  Age: 38.0 (30 – 49.5) Median (IQR) | Median: 295.67 | IQR: 216.50–530.31 |
| (Li *et al.*, 2024)  (China) | N =35,  Age: 30.8±11.3,  9 males | Median: 226.08 | IQR: 156.52 - 730.43 |
| (Xiong *et al.*, 2020)  (China) | N =35,  Age: 65.3 ± 8.52,  17 males | Mean: 5500 | SD: 3000 |
| (Yang *et al.*, 2019)  (China) | N =35,  Age: 25.57 ± 1.77, 16 males | Mean: 53016.15 | SD: 20905.63 |
| (Fang *et al.*, 2018)  (China) | N =32,  Age: 44.3±9.4,  9 males | Mean: 88500 | SD: 25401 |
| (Xiong *et al.*, 2016)  (China) | N =32,  Age: 40.1 ± 11.9,  17 males | Mean: 810 | SD: 566.9 |
| (Ng *et al.*, 2018)  (Singapore) | N =30,  Age: 67.0 ± 4.18,  7 males | Mean: 499.99 | 95% CI: 196.96-803.03 |
| (Fang *et al.*, 2019)  (China) | N =29,  Age: 33.24 ± 5.99,  12 males | Mean: 4509.8 | SD: 147.06 |
| (Wen *et al.*, 2024)  (Taiwan) | N =24,  Age: 63.0 ± 11.8,  22 males | Mean: 489.32 | SD: 838.06 |
| (Xu *et al.*, 2019)  (China) | N =20,  Age: 53.45±9.45,  11 males | Mean: 3567.49 | SD: 330.58 |
| (Sungkarat *et al.*, 2018)  (Thailand) | N =20,  Age: 67.15 ± 4.31 | Mean: 20180 | SD: 4330 |
| (Ploydang *et al.*, 2023)  (Thailand) | N =17,  Age: 69.2 ± 5.3,  7 males | Mean: 241 | SD: 16 |
| (Yang *et al.*, 2016)  (China) | N =16,  Age: 50.4 ± 6.4,  12 males | Median: 4350 | IQR: 1750 - 9740 |
| (Liu *et al.*, 2022)  (Taiwan) | N =14,  Age: 57.3 ± 8.7,  8 males | Mean: 3952 | SD: 1106.5 |
| (Pratt *et al.*, 2025)  (Ireland) | N =223,  Age: 63.6 ± 7.7 | Mean: 1350.55 | SD: 907.75 |
| (Gredicak *et al.*, 2024)  (Croatia) | N = 208,  Age: 24 - 71,  104 males | Mean: 2187 | SD: 2080 |
| (Sustar *et al.*, 2019)  (Croatia) | N = 156,  Age: 44.11 ± 11.63  52 males | Median: 6360 | IQR: 3810 - 10130 |
| (García-Marchena *et al.*, 2017)  (Spain) | N =55,  Age: 45.15 ± 10.06  36 males | Mean: 483.05 | 95% CI: 348.33–671.42 |
| (Ryan *et al.*, 2018)  (Ireland) | N =50,  Age: 47.9 ± 14.0,  17 males | Mean: 12020 | SD: 7970 |
| (Sagud *et al.*, 2016)  (Croatia) | N =44,  Age: 49.8 ± 8.3,  14 males | Mean: 573.3 | SD: 305.4 |
| (Jordan *et al.*, 2018)  (Germany) | N =43,  Age: 35 (26-45)  Median (IQR),  26 males | Median: 1805 | IQR: 1046 - 3378 |
| (Przybylska *et al.*, 2024)  (Poland) | N =40,  Age: 56±9.0,  44 males | Mean: 50663 | SD: 6750 |
| (Torres-Galván *et al.*, 2024)  (Spain) | N =40,  Age: 46.0 (32.3-54.0)  Median (IQR),  22 males | Mean: 3.56 | 95% CI: 2.41 - 5.24 |
| (Jasim *et al.*, 2020)  (Sweden) | N =39,  Age: 28.8 ± 6.9,  7 males | Mean: 151.81 | SD: 125.9 |
| (Buselli *et al.*, 2019)  (Italy) | N =38,  Age: 43.7 ± 10.5,  20 males | Mean: 41 | SD: 22.9 |
| (Janel *et al.*, 2017)  (Paris and Germany) | N =36,  Age: 66.7 ± 8.4 | Mean: 3230 | SD: 1250 |
| (Baumeister *et al.*, 2019)  (Germany) | N =35,  Age: 61.9±12.5,  20 males | Mean: 326.95 | 95% CI: 282.50–371.96 |
| (Dirks *et al.*, 2020)  (Germany) | N =33,  Age: 58.6±7.9,  15 males | Median: 7697.13 | IQR: 5360.05-17940.80 |
| (Paczkowska *et al.*, 2015)  (Poland) | N =25,  Age: 35.6 ± 8.4,  25 males | Median: 7020 | IQR: 6366 |
| (Olğun *et al.*, 2024)  (Turkey) | N =22,  Age: 71.3 ± 7.2,  6 males | Mean: 1698 | SD: 599 |
| (Silva-Peña *et al.*, 2019)  (Spain) | N =22,  Age: 47.2 ± 10.7,  19 males | Mean: 759.99 | SD: 100.01 |
| (Amadio *et al.*, 2019)  (Italy) | N =21,  Age: 29 - 78 | Mean: 208.9 | SD: 25.13 |
| (Ou *et al.*, 2021)  (UK) | N =20,  Age: 50.7 ± 11.0,  10 males | Median: 749.8 | IQR: 210.2 - 1412.5 |
| (Riezzo *et al.*, 2019)  (Italy) | N =20,  Age: 42.4±13.8 | Mean: 27.2 | SE: 1.6 |
| (Baumert *et al.*, 2019)  (Poland) | N =19,  Age: 52.0 (11.5) Median (IQR),  19 males | Median: 2444 | IQR: 2312 |
| (Jørgensen *et al.*, 2019)  (Denmark) | N =14,  Age: 45 (37-47) Median (IQR),  4 males | Median: 167700 | IQR: 48200 - 296200 |
| (Stratta *et al.*, 2016)  (Italy) | N =14,  Age: 44.5 ± 10.47,  2 males | Mean: 6140.77 | SD: 4219.82 |
| (Hinderberger *et al.*, 2016)  (Germany) | N =14,  Age: 36.1 ± 7.2,  5 males | Mean: 27100 | SD: 5300 |
| (Amadio *et al.*, 2017)  (Italy ) | N =12,  Age: 33–60,  12 males | Mean: 166.33 | SD: 118.03 |
| (Passaro *et al.*, 2017)  (Slovenia) | N =8,  Age: 59.1±2.5 | Mean: 37.53 | SD: 18.58 |
| (Weickert *et al.*, 2019)  (Australia) | N =87,  Age: 31.9 ± 8.3,  46 males | Mean: 1505.74 | SD: 314.7 |
| (Marston *et al.*, 2019)  (Australia) | N =15,  Age: 59.1 ± 7.4,  3 males | Mean: 28307.3 | SD: 7313.8 |
| (Brunoni *et al.*, 2015)  (Brazil) | N =307,  Age: 57.4 ± 7.6,  167 males | Mean: 5947 | SD: 6300 |
| (Diz *et al.*, 2017)  (Brazil) | N =67,  Age: 71.3 ± 4.9 | Mean: 6331.8 | SD: 3364 |
| (Daray *et al.*, 2024)  (Argentina) | N =42,  Age:39 (30.2-49.0) Median (IQR)  14 males | Median: 4941.17 | IQR: 3058.82 - 7058.82 |
| (Uint *et al.*, 2019)  (Brazil) | N =41,  Age: 50.4 ± 9.0,  8 males | Median: 21793 | IQR: 12,613 – 32,555.5 |
| (Petersen *et al.*, 2018)  (Brazil) | N =30,  Age: 56.2 ± 9.8,  7 males | Mean: 11543.3 | SD: 3772 |
| (Mansur *et al.*, 2016)  (Brazil) | N =26,  Age: 39.0 ± 13.7,  10 males | Median: 7610 | IQR: 5860 |
| (Casas *et al.*, 2017)  (Argentina) | N =20,  Age: 73.5 ± 4.2,  10 males | Mean: 12595 | SD: 10131 |
| (Ribeiro *et al.*, 2018)  (Brazil) | N =19,  Age: 51.05±1.90 | Mean: 1695.4 | SD: 143.68 |
| (Costa *et al.*, 2019)  (Brazil) | N =17,  Age: 62.0 (60-66) Median (IQR),  10 males | Median: 340.1 | IQR: 184–464.1 |
| (Silveira-Rodrigues *et al.*, 2023)  (Brazil) | N =13,  Age: 63.3 ± 7.8,  1 males | Mean: 163 | SD: 71 |
| (da Silveira *et al.*, 2017)  (Brazil) | N =8,  Age: 32.54 ± 5.32,  8 males | Mean: 580 | SD: 120 |
| (Zamani *et al.*, 2019)  (Iran) | N =108,  Age: 38.96 ± 10.04  35 males | Mean: 36310 | SD: 1290 |
| (Al-Rawaf *et al.*, 2021)  (Saudi Arabia) | N =80,  Age: 65.3 ± 3.5,  50 males | Mean: 4481.13 | SD: 117.93 |
| (Al-Temaimi *et al.*, 2017)  (Kuwait) | N =77,  Age: 28 (24-35) Median (IQR),  24 males | Mean: 3060 | IQR: 0.902–5.988 |
| (Al-Temaimi *et al.*, 2024)  (Kuwait) | N =75,  Age: 34.52 ± 6.6,  24 males | Mean: 3880 | SD: 3800 |
| (Alomari *et al.*, 2018)  (Jordan) | N =30,  Age: 56.9 ± 12.8 | Mean: 25000 | SD: 16000 |
| (Agyekum & Yeboah, 2024)  (Ghana) | N =80,  Age: 53.6 ± 10.6,  35 males | Mean: 26100 | SD: 10200 |

Summary of blood BDNF levels among control participants in included studies. Reported values reflect means or medians with respective measures of dispersion (standard deviation, interquartile range, or standard error), and include sample demographics where available

**Supplement table 5:** **GFAP levels among apparently cognitively normal adults**

| **Citation & Region** | **Sample Characteristics** | **GFAP level (pg/mL)** | |
| --- | --- | --- | --- |
| **Central Tendency** | **Dispersion** |
| (Verberk *et al.*, 2024)  (Netherland and UK) | N =259,  Age: 59 ± 8 | Mean: 66 | SD: 36 |
| (Beyer *et al.*, 2023)  (Germany) | N =238,  Age: 66.1 ± 4.6,  114 males | Mean: 99.6 | SD: 46.7 |
| (Pereira *et al.*, 2021)  (Sweden) | N =217,  Age: Mean (Range) 63.8 (41.2–87.9),  98 males | Median: 179.6 | Range: 31.1–534.9 |
| (Yue *et al.*, 2019)  (USA) | N =209 | Mean: 11 | SD: 12.7 |
| (Sudre *et al.*, 2019)  (Europe & Canada) | N =203,  Age: 46.5 ± 13.4,  86 males | Mean: 125.4 | SD: 64.4 |
| (Xu *et al.*, 2024)  (China) | N =187,  Age: 67.6 ± 6.40,  87 males | Mean: 19.1 | SD: 12.8 |
| (Jiao *et al.*, 2025)  (China) | N =184,  Age: 67.6 ± 6.5,  84 males | Median: 18.84 | IQR: 14.13 - 28.27 |
| (Heller *et al.*, 2020)  (Europe & Canada) | N =183,  Age: 43.8 (36.3–55.1) Median (IQR),  81 males | Median: 105.8 | IQR: 80.4–146.1 |
| (Fenoglio *et al.*, 2024)  (Europe and Canada) | N =173,  Age: 47 ± 12,  67 males | Mean: 106.2 | SEM: 12 |
| (Sheth *et al.*, 2025)  (USA) | N =161,  Age: 40–80,  55 males | Median: 126.3 | Range: 40.0 - 402.7 |
| (Mandelblatt *et al.*, 2024)  (USA) | N =153,  Age: 68.2 ± 6.6 | Mean: 121.2 | SD: 61.64 |
| (Broos *et al.*, 2023)  (Netherlands) | N =125,  Age: 52.9±1.2,  33 males | Median: 51.7 | IQR: 40.1–68.3 |
| (Okonkwo *et al.*, 2020)  (USA) | N =122,  Age: 17–75,  79 males | Median: 13 | IQR: 7–20 |
| (Eratne, Kang*, et al.*, 2024)  (Australia) | N =96,  Age: 44.7 ± 14.4,  46 males | Mean: 75.5 | SD: 46.9 |
| (Wei *et al.*, 2025)  (China) | N =93,  Age: 65.12 ± 3.98,  34 males | Mean: 86.84 | SD: 36.53 |
| (Bolsewig *et al.*, 2024)  (Netherlands, Norway, Sweden, UK, Italy, Germany, Belgium, Slovenia, France, Switzerland) | N =89,  Age: 67.4 ± 7.3,  48 males | Median: 99.3 | IQR: 71.3 - 140 |
| (Katsanos *et al.*, 2017)  (Greece) | N =79,  Age: 39.5±11.8,  63 males | Median: 0 | IQR: 0 - 210 |
| (Pilotto *et al.*, 2024)  (Italy) | N =78,  Age: 69.4 ± 7.9,  24 males | Mean: 117.7 | SD: 64.9 |
| (Sarfo *et al.*, 2018)  (Ghana and Nigeria) | N =74,  Age: 60.4 ± 14.7,  37 males | Mean: 676 | SD: 928 |
| (van Ballegoij *et al.*, 2020)  (Netherlands) | N =73,  Age: 44.05 ± 10.79,  36 males | Median: 70.1 | IQR: 55.6–93.1 |
| (Bogoslovsky *et al.*, 2017)  (USA) | N =69,  Age: 45 (31–52) Median (IQR),  23 males | Median: 0.8 | IQR: 0.8 - 1.07 |
| (Verberk *et al.*, 2024)  (Netherland and UK) | N =64,  Age: 68 ± 6 | Mean: 124 | SD: 66 |
| (Saraceno *et al.*, 2024)  (Italy) | N =60,  Age: 68.97 ± 5.99,  21 males | Mean: 75.55 | SD: 13.26 |
| (Axelsson *et al.*, 2025)  (Sweden) | N =55,  Age: 64 ± 11,  31 males | Median: 153 | IQR: 116–211 |
| (Bentivenga *et al.*, 2024)  (Italy) | N =54,  Age: 62.2 ± 4.9,  34 males | Median: 126 | IQR: 95–157 |
| (Gómez-Tortosa *et al.*, 2025)  (Spain) | N =54,  Age: 69 ± 5,  23 males | Median: 150.53 | IQR: 107.52 - 247.31 |
| (Miner *et al.*, 2024)  (USA) | N =51,  Age: 59.5 ± 8.5,  51 males | Mean: 58.74 | SD: 32 |
| (Kanberg *et al.*, 2021)  (Sweden) | N =51,  Age: 55.0 (43.0–63.0)  Median (IQR),  13 males | Median: 129 | IQR: 104–172 |
| (Gill *et al.*, 2018)  (USA) | N =49,  Age: 48.61 ± 15.93,  30 males | Median: 56.18 | IQR: 45.98–69.84 |
| (Galenko *et al.*, 2019)  (Utah-USA) | N =47,  Age: 57.8±11.8,  21 males | Median: 1.15 | IQR: 0.73 - 1.46 |
| (Posti *et al.*, 2016)  (Finland and UK) | N =45,  Age: 44.9 ± 18.8 | Median: 190 | IQR: 0 - 260 |
| (Boerwinkle *et al.*, 2025)  (USA) | N =42,  Age: 43.57 ± 12.5,  9 males | Median: 87.5 | IQR: 52.5 - 117.5 |
| (Colombo *et al.*, 2025)  (Italy) | N =41,  Age: 55.0 (30.0–60.0)  Median (IQR),  10 males | Median: 76.5 | IQR: 54.17-105.66 |
| (Chang *et al.*, 2024)  (Taiwan) | N =36,  Age: 67.17 ± 3.03,  14 males | Mean: 18.4 | SD: 7.04 |
| (He *et al.*, 2024)  (China) | N =36,  Age: 47.81 ± 10.88 | Median: 844.09 | IQR: 594.47 – 1594.0 |
| (K. Li *et al.*, 2025)  (China) | N =35,  Age: 30.80 ± 11.32,  13 males | Mean: 56.74 | 95% CI: 46.28 - 67.21 |
| (Kanberg *et al.*, 2020)  (Sweden) | N =33,  Age: 67.0 (42.3–77.8)  Median (IQR),  17 males | Median: 141 | IQR: 108–207 |
| (Sewell *et al.*, 2024)  (Australia) | N =32,  Age: 68.7 ± 5.9,  13 males | Mean: 118.6 | SD: 39.7 |
| (Cousins *et al.*, 2022)  (USA) | N =31,  Age: 69 (64.5 - 74.5)  Median (Range),  9 males | Median: 118.94 | IQR: 96.77 - 163.13 |
| (Chen *et al.*, 2025)  (China) | N =30,  Age: 65.9 ± 6.0,  17 males | Mean: 124 | SD: 61.8 |
| (Janelidze *et al.*, 2022)  (USA) | N =29,  Age: 45.0 (32.0–54.0) Median (IQR) | Median: 88.3 | IQR: 56.6 - 116.2 |
| (Hirata *et al.*, 2024)  (Japan) | N =28,  Age: 66.6 ± 10.1,  13 males | Mean: 105.5 | SD: 41.9 |
| (Vrillon *et al.*, 2024)  (France) | N =27,  Age: 61.3 ± 10.0,  11 males | Median: 59.4 | IQR: 35.3 |
| (Eratne, Lewis*, et al.*, 2024)  (Australia) | N =25,  Age: 40.7 ± 7.44,  5 males | Mean: 75.1 | SD: 27.6 |
| (Fraussen *et al.*, 2025)  (Belgium and The Netherlands) | N =22,  Age: 58 (28.3)  Median (IQR),  19 males | Mean: 42 | SD: 30 |
| (Vallabh *et al.*, 2024)  (USA) | N =21,  Age: 46.1 ±13.3,  6 males | Mean: 145.9 | SD: 150.1 |
| (Katzdobler *et al.*, 2024)  (Germany) | N =21,  Age: 62.4 ± 9.2,  14 males | Mean: 102.1 | SD: 78.2 |
| (Hajari *et al.*, 2025)  (Denmark) | N =20,  Age: 34.1 (26.6 - 59.9) Median (IQR) | Median: 205.38 | IQR: 141.40 - 251.31 |
| (van Prooije *et al.*, 2024)  (Netherlands) | N =20,  Age: 50.1 ± 13.7,  12 males | Mean: 106.8 | SD: 27.7 |
| (Chen *et al.*, 2024)  (China) | N =20,  Age: 65.7 ± 9.1,  10 males | Median: 96.1 | IQR: 66.5 - 135.2 |
| (Savarraj *et al.*, 2021)  (USA) | N =20,  Age: 61 ± 15,  9 males | Mean: 2.68 | SE: 0.9 |
| (Marelli *et al.*, 2020)  (France and Paris) | N =19,  Age: 60 (59 - 61) Median (Range) | Median: 41.64 | Range: 12.14 - 81.29 |
| (Shahim *et al.*, 2022)  (Swedan) | N =19,  Age: 25 (21-35) mean (Range),  15 males | Median: 48.49 | Range: 37.61 - 62.08 |
| (C. H. Li *et al.*, 2025)  (Taiwan) | N =18,  Age: 63.8 ± 10.6,  7 males | Mean: 91.7 | SD: 57.3 |
| (Kammeyer *et al.*, 2024)  (USA) | N =13,  Age: 26.6 ± 13.3,  1 males | Mean: 50.4 | SD: 15 |
| (Mohaupt *et al.*, 2024)  (Germany) | N =12,  Age: 71 (59 - 74) Median (IQR),  5 males | Median: 130 | IQR: 96 - 191 |
| (N. A. Singh *et al.*, 2024)  (USA) | N =8,  Age: 64.6 (61.4 - 67.3) Median (Range),  3 males | Median: 59.13 | IQR: 50.13–67.96 |
| (Kowalski *et al.*, 2023)  (USA) | N =5,  Age: 70 (65 - 86) Median (Range) | Median: 80.37 | Range: 56.43-132.86 |

Summary of blood GFAP levels among control participants in included studies. Reported values reflect means or medians with respective measures of dispersion (standard deviation, interquartile range, or standard error), and include sample demographics where available
